# Supplementary material
Source: PubMed Central journal article supplement (PMC8743436)

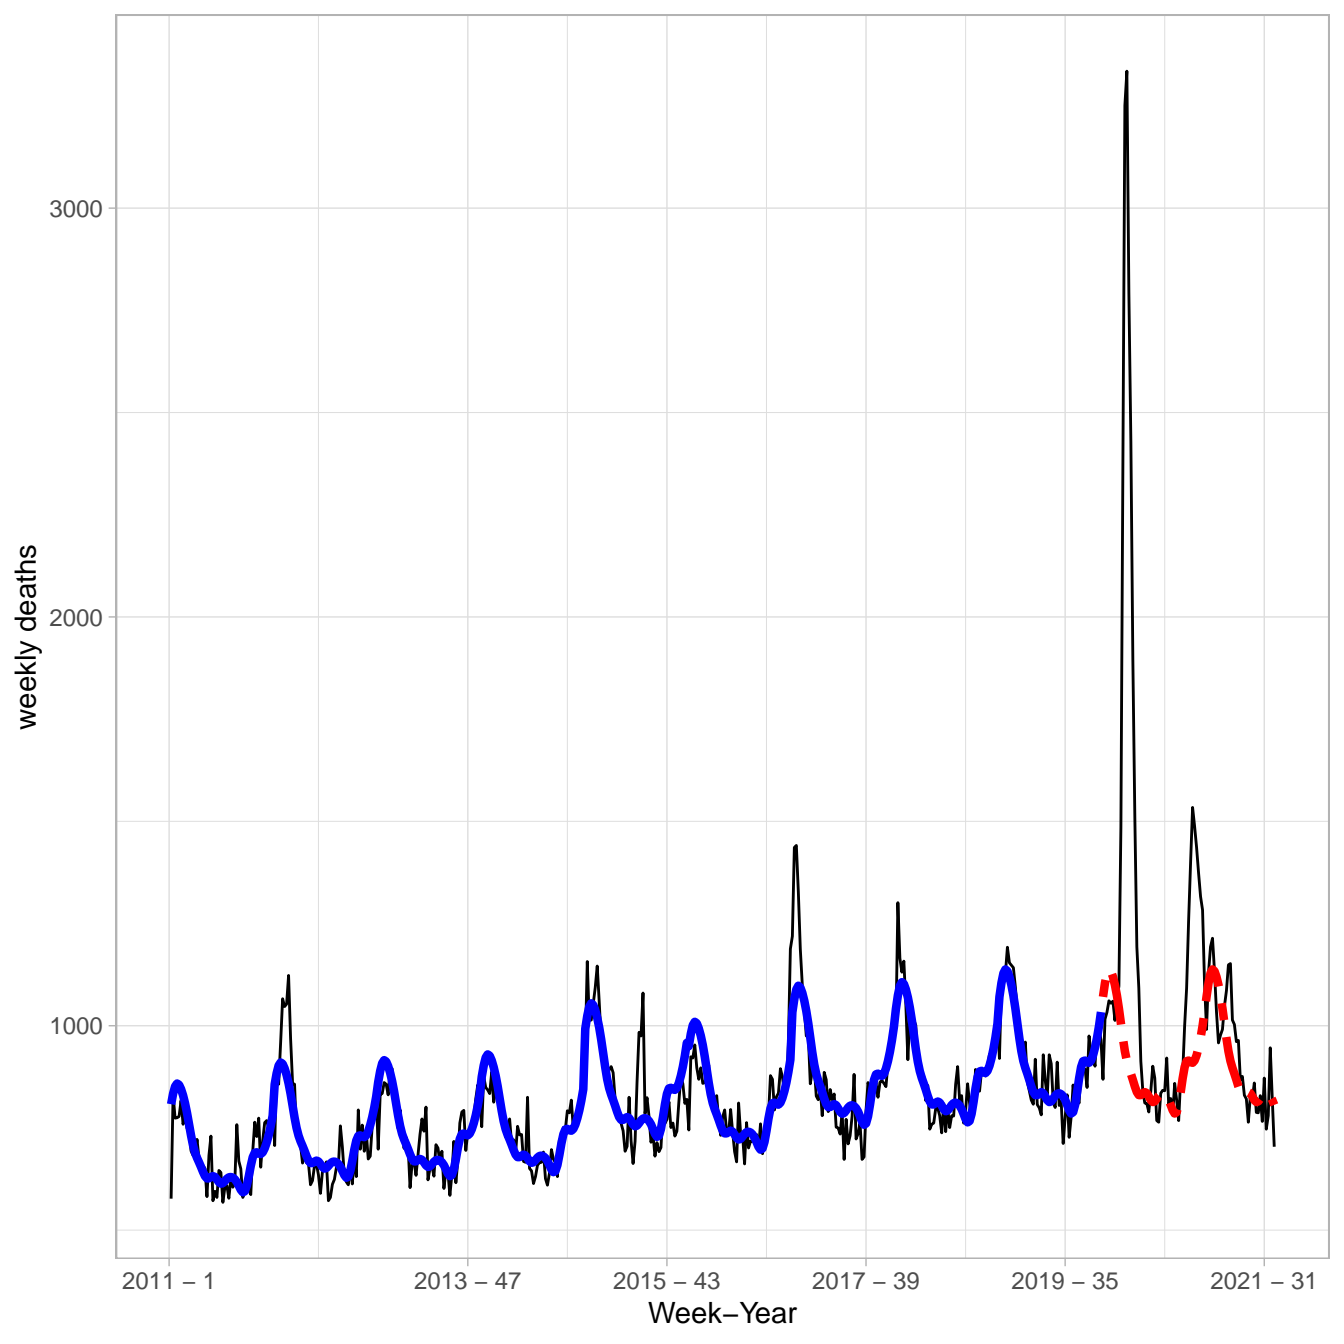

Supplement: 40520_2021_2060_MOESM1_ESM.pdf [file 40520_2021_2060_MOESM1_ESM.pdf]

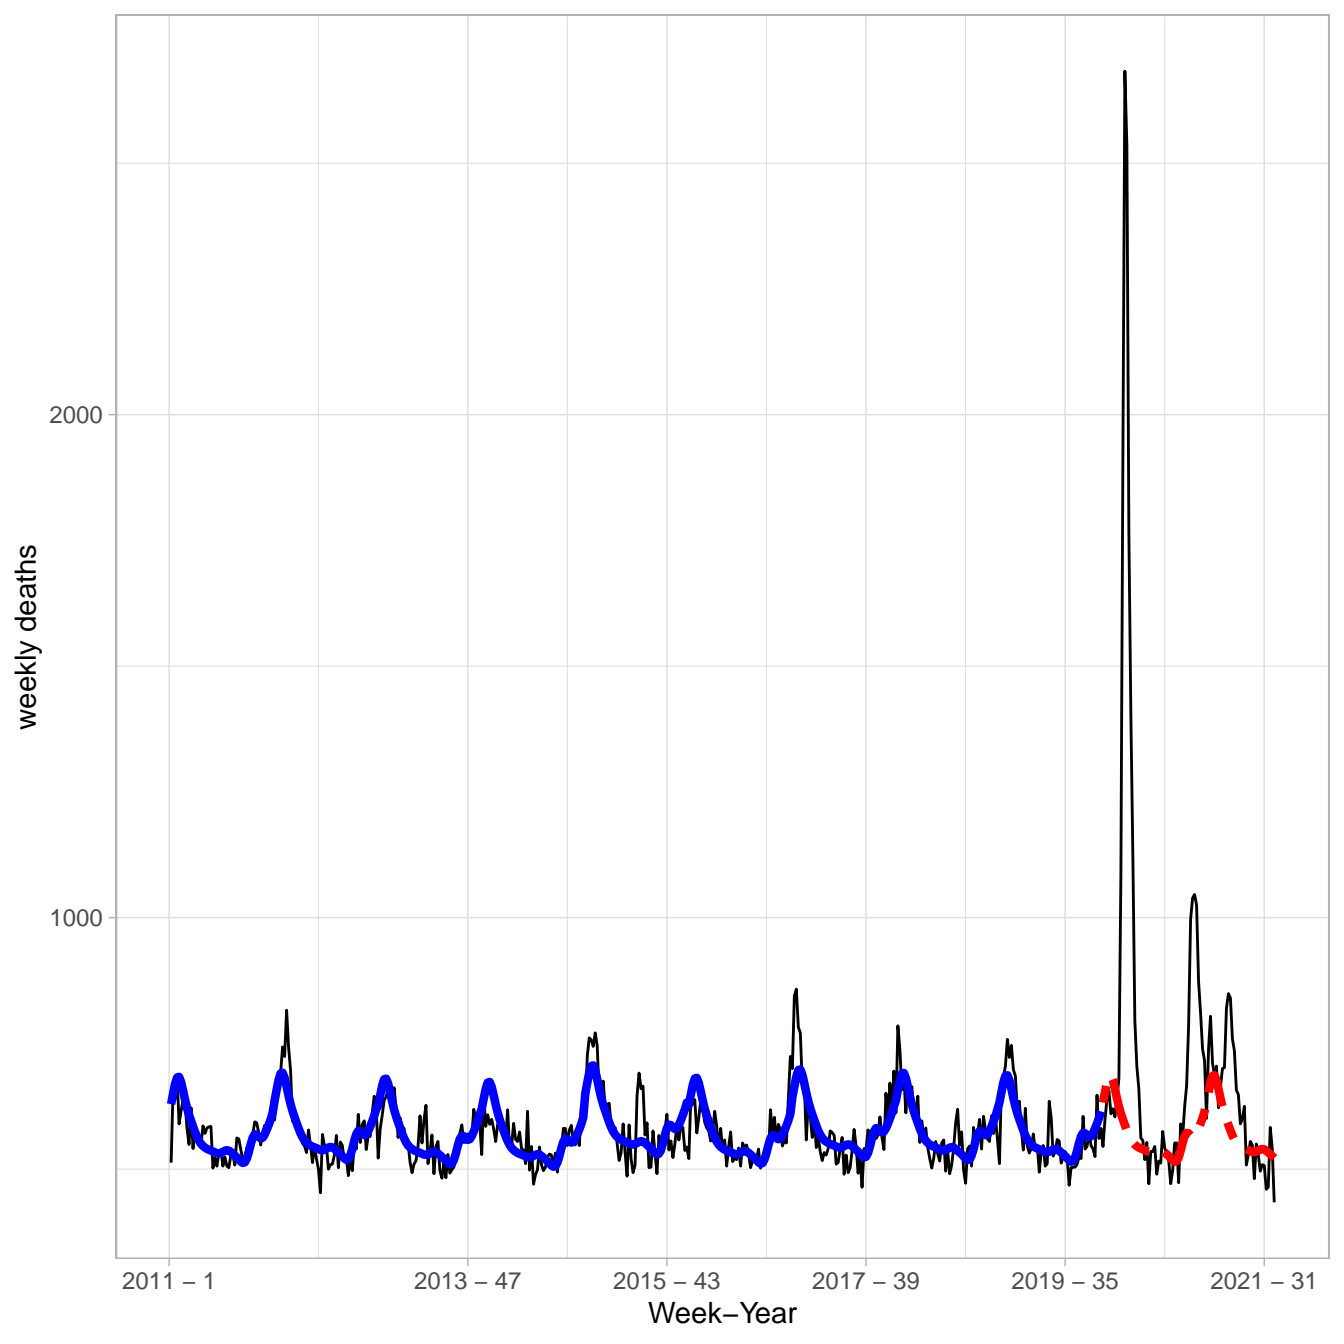

Supplement: 40520_2021_2060_MOESM2_ESM.pdf [file 40520_2021_2060_MOESM2_ESM.pdf]

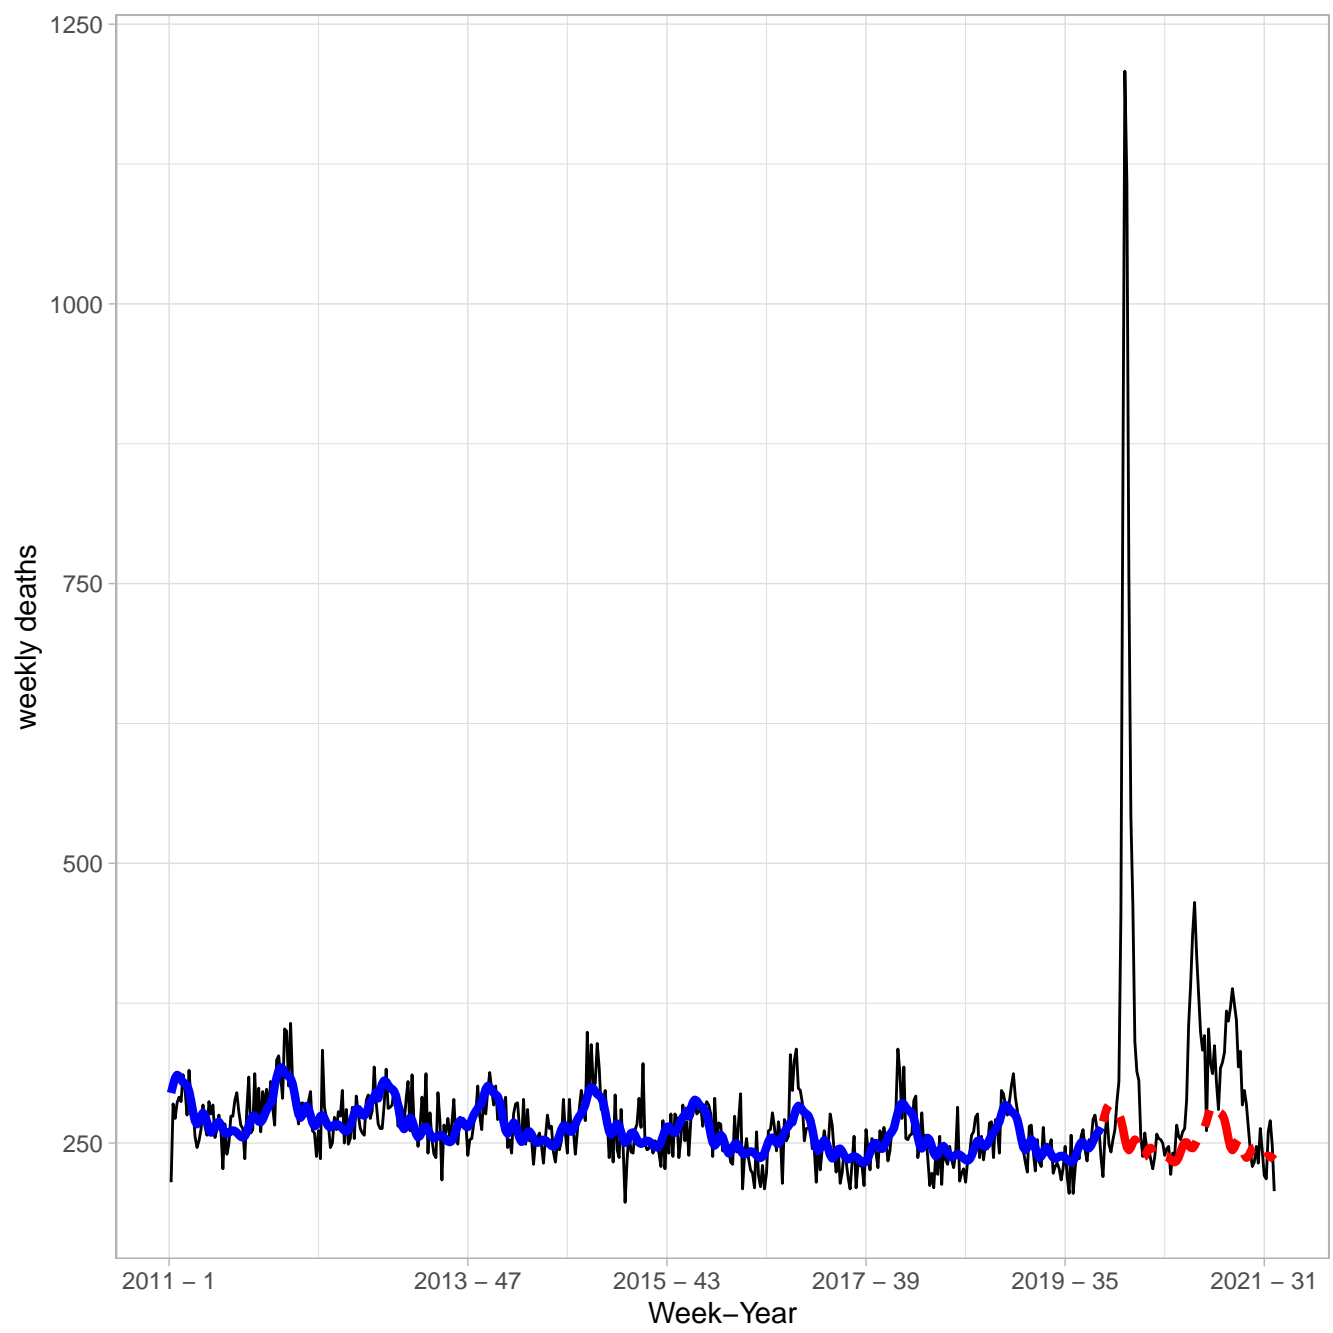

Supplement: 40520_2021_2060_MOESM3_ESM.pdf [file 40520_2021_2060_MOESM3_ESM.pdf]

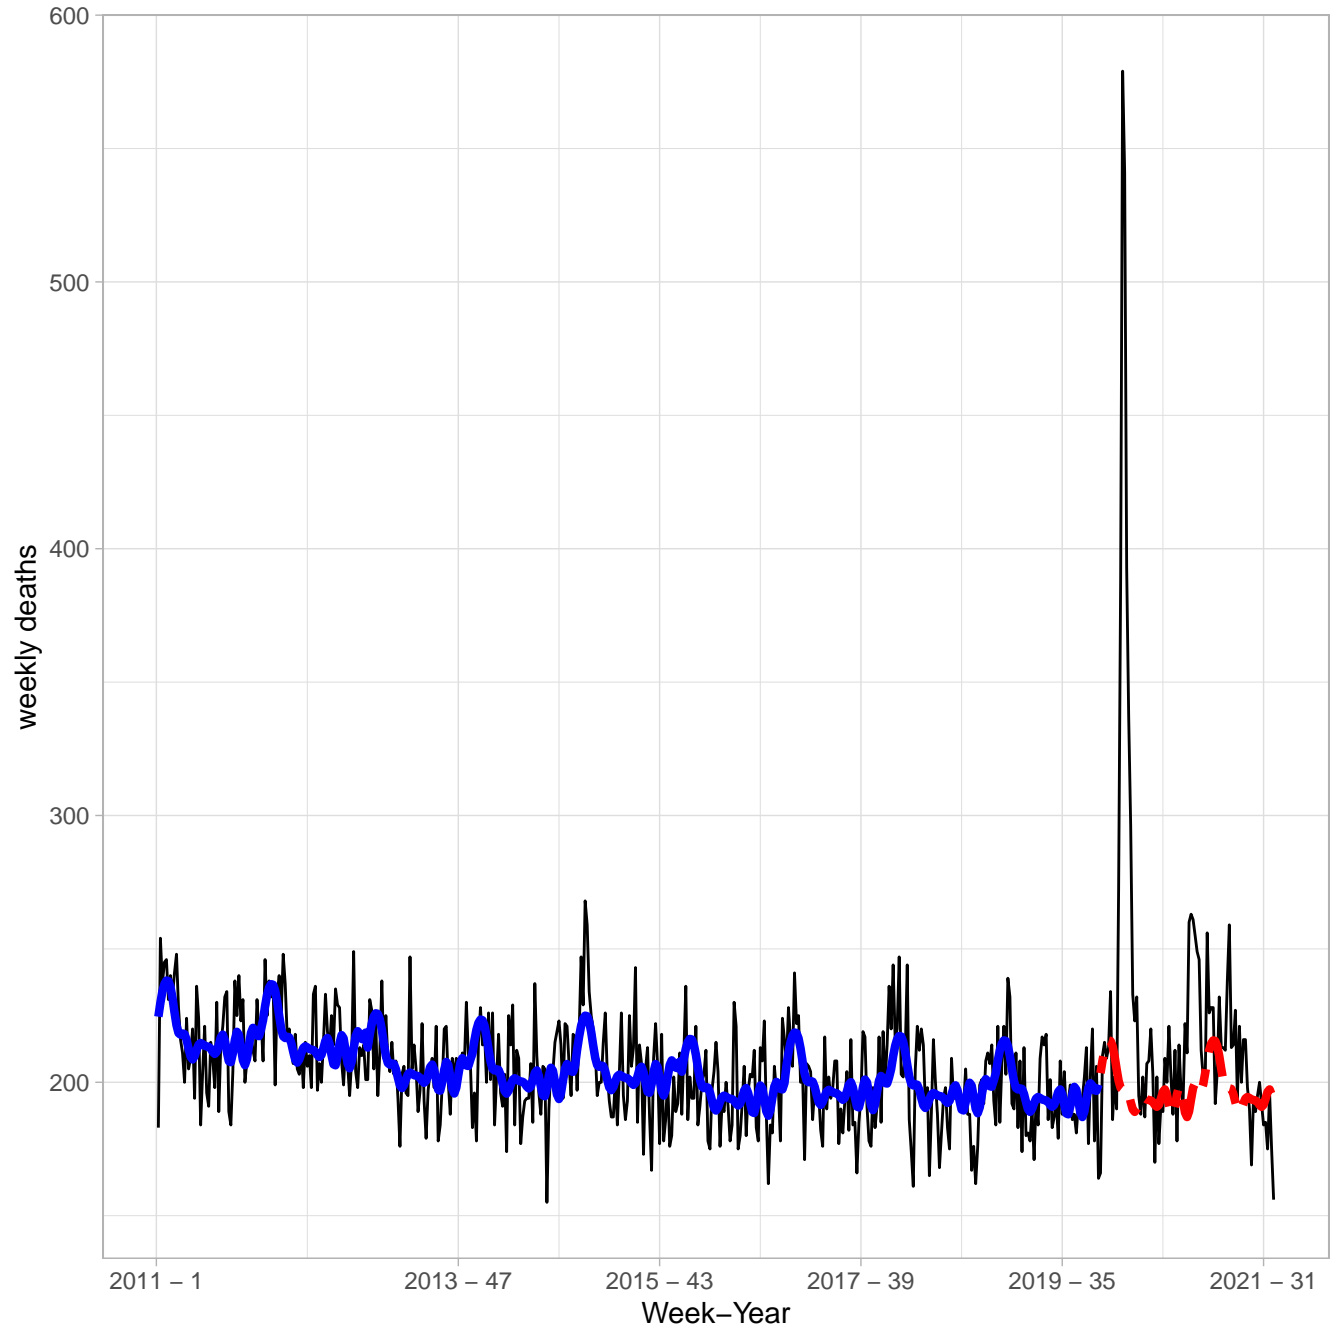

Supplement: 40520_2021_2060_MOESM4_ESM.pdf [file 40520_2021_2060_MOESM4_ESM.pdf]

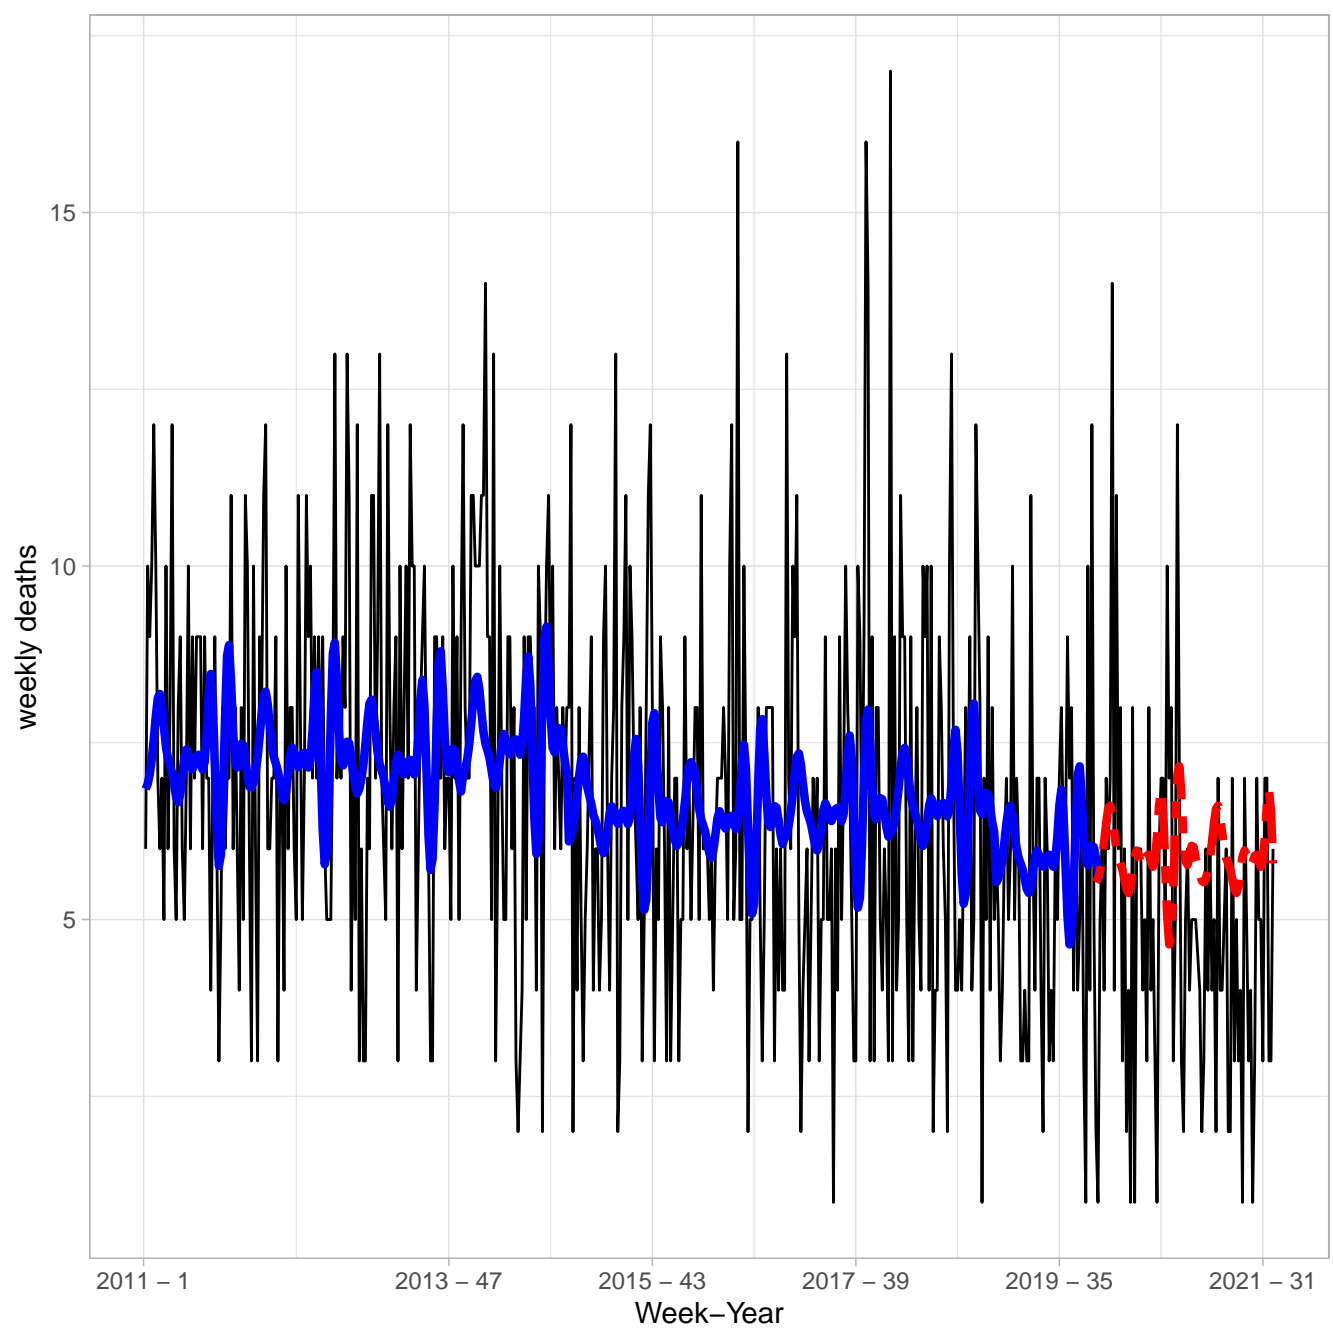

Supplement: 40520_2021_2060_MOESM5_ESM.pdf [file 40520_2021_2060_MOESM5_ESM.pdf]
